# Supplementary material for: Demographic and policy-based differences in behaviors and attitudes towards driving after marijuana use: an analysis of the 2013–2017 Traffic Safety Culture Index
Source: BMC Res Notes. 2021 Jun 3;14:226. doi: 10.1186/s13104-021-05643-3 (PMC8176701; doi:10.1186/s13104-021-05643-3)
Supplement: Supplementary file 1 — Additional file 1. Supplementary Tables: Tables S1 and S2 tabulate the effective dates of recreational, medical, and per-se marijuana policies that were used in the main analysis. Table S3 presents the results from the main analysis, however the p-values are not corrected for multiple comparisons, as they were in the manuscript. Table S4 presents policy-based differences in the three outcomes only among those who self-reported using marijuana in the last year. [file 13104_2021_5643_MOESM1_ESM.docx]

**Additional Materials for** ***Demographic and policy-based differences in behaviors and attitudes towards driving after marijuana use: an analysis of the 2013-2017 Traffic Safety Culture Index.***

Marco H. Benedettia, Li Lia,b, Lucas M. Neurotha,b, Kayleigh D. Humphriesa, Ashley Brooks-Russellc, Motao Zhu­a,b,d

aThe Center for Injury Research and Policy, Abigail Wexner Research Institute at Nationwide Children’s Hospital

700 Children’s Drive

Columbus, OH 43215

USA

bDivision of Epidemiology, College of Public Health, The Ohio State University

1841 Neil Avenue
Columbus, OH 43210

USA

cDepartment of Community and Behavioral Health, Colorado School of Public Health

13001 E. 17th Place

Mail Stop B119

Aurora, CO 80045

USA

dDepartment of Pediatrics, College of Medicine, The Ohio State University

370 W. 9th Avenue

Columbus, OH 43210

USA

Corresponding Author: Motao Zhu

700 Children’s Drive, RB3-WB5217,

Columbus, OH 43205

USA

Phone: +1 (614) 355-6687

Email: [Motao.Zhu@NationwideChildrens.org](mailto:Motao.Zhu@NationwideChildrens.org)

Author Emails:

Marco.Benedetti@nationwidechildrens.org

Li.6043@osu.edu

Lucas.Neuroth@nationwidechildrens.org

Kayleigh.Humphries@nationwidechildrens.org

Ashley.Brooks-Russell@cuanschutz.edu

Motao.Zhu@nationwidechildrens.org

In this document, we present a set of tables to supplement the manuscript *Demographic and policy-based differences in behaviors and attitudes towards driving after marijuana use: an analysis of the 2013-2017 Traffic Safety Culture Index.* Tables S1 and S2 tabulate the effective dates of recreational, medical, and per-se marijuana policies that were used in the main analysis. Table S3 presents the results from the main analysis, however the *p-*values are not corrected for multiple comparisons, as they were in the manuscript. Finally, Table S4 presents policy-based differences in the three outcomes only among those who self-reported using marijuana.

| **State** | **Effective date of recreational marijuana legalization** | **Effective date of medical marijuana legalization** | **Effective date of per-se marijuana law** |
| --- | --- | --- | --- |
| Alabama | **--** | **--** | **--** |
| Alaska | 2/24/2015 | 3/4/1999 | **--** |
| Arizona | **--** | 4/14/2011 | **--** |
| Arkansas | **--** | 11/9/2016 | **--** |
| California | 11/9/2016 | 11/6/1996 | **--** |
| Colorado | 12/10/2012 | 12/28/2000 | **--** |
| Connecticut | **--** | 5/31/2012 | **--** |
| Delaware | **--** | 7/1/2011 | 6/28/2006 |
| District of Columbia | 2/26/2015 | 2/25/2010 | **--** |
| Florida | **--** | 1/3/2017 | **--** |
| Georgia | **--** | **--** | 1/1/2000 |
| Hawaii | **--** | 6/14/2000 | **--** |
| Idaho | **--** | **--** | **--** |
| Illinois | 6/25/2019 | 1/1/2014 | 7/29/2016 |
| Indiana | **--** | **--** | 1/1/2000 |
| Iowa | **--** | **--** | 7/1/1997 |
| Kansas | **--** | **--** | **--** |
| Kentucky | **--** | **--** | **--** |
| Louisiana | **--** | 6/29/2015 | **--** |
| Maine | 1/30/2017 | 12/23/1999 | **--** |
| Maryland |  | 6/1/2014 | **--** |
| Massachusetts | 12/15/2016 | 1/1/2013 | **--** |
| Michigan | 12/6/2018 | 12/4/2008 | 7/15/2003 |
| Minnesota | **--** | 5/30/2014 | **--** |
| Mississippi | **--** | **--** | **--** |

**Table S1: Effective dates of state marijuana policies: Alabama-Mississippi**

| **State** | **Effective date of recreational marijuana legalization** | **Effective date of medical marijuana legalization** | **Effective date of per-se marijuana law** |
| --- | --- | --- | --- |
| Missouri | **--** | 12/6/2018 | **--** |
| Montana | **--** | 11/2/2004 | 10/1/2013 |
| Nebraska | **--** | **--** | **--** |
| Nevada | 1/1/2017 | 10/1/2001 | 6/11/1999 |
| New Hampshire | **--** | 7/23/2013 | **--** |
| New Jersey | **--** | 10/1/2010 | **--** |
| New Mexico | **--** | 7/1/2007 | **--** |
| New York | **--** | 7/5/2014 | **--** |
| North Carolina | **--** | **--** | **--** |
| North Dakota | **--** | 4/18/2017 | **--** |
| Ohio | **--** | 9/8/2016 | 8/17/2006 |
| Oklahoma | **--** | 7/26/2018 | 10/1/2013 |
| Oregon | 6/30/2015 | 1/1/1998 | **--** |
| Pennsylvania | **--** | 5/18/2016 | 2/1/2004 |
| Rhode Island | **--** | 1/3/2006 | 7/12/1990 |
| South Carolina | **--** | **--** | **--** |
| South Dakota | **--** | **--** | **--** |
| Tennessee | **--** | **--** | **--** |
| Texas | **--** | **--** | **--** |
| Utah | **--** | 12/1/2018 | 5/2/1994 |
| Vermont | 7/1/2018 | 5/26/2004 | **--** |
| Virginia | **--** | **--** | **--** |
| Washington | 12/6/2012 | 11/3/1998 | 12/6/2012 |
| West Virginia | **--** | 7/5/2017 | 7/5/2017 |
| Wisconsin | **--** | **--** | 12/19/2003 |
| Wyoming | **--** | **--** | **--** |

**Table S2: Effective dates of state marijuana policies: Missouri-Wyoming**

| **Variable** | **Level** | **Unweighted sample size**a | **Weighted percent of total sample**  **(95% CI)** | **Drivers who self-reported driving within one hour of using marijuana at least once in the last year.** | | **Respondents who said driving within one hour of using marijuana is somewhat or completely acceptable.** | | **Respondents who somewhat or strongly support a per-se marijuana law.** | |
| --- | --- | --- | --- | --- | --- | --- | --- | --- | --- |
| **Weighted**  **percent**  **(95% CI)** | **Rao-Scott**  **p-value**b | **Weighted**  **percent**  **(95% CI)** | **Rao-Scott**  **p-value**b | **Weighted**  **percent**  **(95% CI)** | **Rao-Scott**  **p-value**b |
| Full Sample | NA | 11,816 | -- | 5.0 (4.5, 5.4) | -- | 9.7 (9.1, 10.3) | -- | 82.6 (81.8, 83.4) | -- |
| Gender | Male | 5,753 | 48.1 (47.1, 49.2) | 6.5 (5.8, 7.3) |  | 11.1 (10.1, 12.0) |  | 80.5 (79.2, 81.7) |  |
| Female | 6,063 | 51.9 (50.8, 52.9) | 3.5 (2.9, 4.1) | **<0.001** | 8.4 (7.6, 9.3) | **<0.001** | 84.4 (83.4, 85.5) | **<0.001** |
| Income | <$25,000 | 1,888 | 17.3 (16.5, 18.1) | 9.4 (7.6, 11.2) |  | 13.8 (12.0, 15.7) |  | 76.0 (73.7, 78.3) |  |
| $25,000-$49,999 | 2,570 | 22.0 (21.1, 22.9) | 5.7 (4.5, 6.8) |  | 10.1 (8.8, 11.5) |  | 81.6 (79.8, 83.4) |  |
|  | $50,000-$74,999 | 2,220 | 18.2 (17.5, 19.0) | 4.3 (3.2, 5.3) |  | 9.2 (7.8, 10.7) |  | 83.9 (82.1, 85.7) |  |
| $75,000-$99,999 | 1,708 | 14.6 (13.9, 15.4) | 3.8 (2.7, 4.9) |  | 9.3 (7.6, 11.0) |  | 82.9 (80.8, 85.0) |  |
|  | $100,000 or more | 3430 | 27.8 (26.9, 28.7) | 3.5 (2.8, 4.2) | **<0.001** | 7.3 (6.3, 8.3) | **<0.001** | 86.2 (84.8, 87.5) | **<0.001** |
| Race/ ethnicity | Non-Hispanic White | 8,696 | 66.0 (65.0, 67.1) | 4.3 (3.8, 4.9) |  | 9.9 (9.1, 10.6) |  | 83.1 (82.1, 84.0) |  |
| Non-Hispanic Black | 1,047 | 11.5 (10.8, 12.3) | 7.5 (5.5, 9.5) |  | 11.5 (9.2, 13.7) |  | 76.5 (73.5, 79.5) |  |
| Non-Hispanic Other | 409 | 5.0 (4.4, 5.5) | 5.9 (3.1, 8.7) |  | 9.3 (6.1, 12.5) |  | 89.5 (86.3, 92.6) |  |
| Hispanic | 1,319 | 15.0 (14.1, 15.8) | 5.2 (3.7, 6.7) |  | 7.7 (6.0, 9.4) |  | 83.9 (81.6, 86.2) |  |
| Non-Hispanic 2+ races | 345 | 2.5 (2.2, 2.9) | 10.1 (5.3, 14.8) | **<0.001** | 9.6 (6.1, 13.2) | 0.080 | 74.6 (68.9, 80.3) | **<0.001** |
| Education | Less than high school | 1,060 | 12.4 (11.6, 13.1) | 8.5 (6.3, 10.7) |  | 11.0 (8.9, 13.2) |  | 78.1 (75.3, 80.9) |  |
|  | High school | 3,448 | 28.7 (27.7, 29.6) | 4.7 (3.8, 5.5) |  | 9.7 (8.6, 10.9) |  | 82.0 (80.5, 83.5) |  |
| Some college | 3,389 | 29.7 (28.8, 30.7) | 5.5 (4.5, 6.4) |  | 11.1 (9.9, 12.4) |  | 81.4 (79.9, 83.0) |  |
|  | Bachelor’s or higher | 3,919 | 29.2 (28.3, 30.2) | 3.6 (2.9, 4.3) | **<0.001** | 7.6 (6.6, 8.6) | **<0.001** | 86.0 (84.7, 87.3) | **<0.001** |
| Age | 19-29 | 1,870 | 19.7 (18.8, 20.6) | 11.6 (9.7, 13.4) |  | 15.1 (13.3, 17.0) |  | 76.0 (73.7, 78.3) |  |
|  | 30-44 | 2,661 | 25.7 (24.7, 26.6) | 5.6 (4.6, 6.5) |  | 12.0 (10.6, 13.5) |  | 79.8 (78.1, 81.6) |  |
|  | 45-59 | 3,608 | 27.3 (26.4, 28.2) | 3.4 (2.7, 4.1) |  | 8.8 (7.7, 9.8) |  | 83.4 (82.0, 84.8) |  |
|  | 60 or older | 3,677 | 27.4 (26.5, 28.3) | 1.8 (1.3, 2.3) | **<0.001** | 4.6 (3.8, 5.4) | **<0.001** | 88.7 (87.5, 89.9) | **<0.001** |
| Marijuana Policy | RM and MM illegal | 6,011 | 51.5 (50.4, 52.5) | 4.3 (3.7, 5.0) |  | 9.6 (8.7, 10.5) |  | 81.7 (80.5, 82.8) |  |
| RM illegal, MM legal | 4855 | 41.0 (40.0, 42.0) | 5.9 (5.1, 6.8) |  | 9.6 (8.6, 10.6) |  | 82.6 (81.4, 83.9) |  |
| RM and MM legal | 950 | 7.5 (7.0,8.1) | 4.2 (2.7, 5.8) | **0.005** | 10.6 (8.2,13.0) | 0.733 | 87.8 (85.3, 90.3) | **0.001** |
| Per-se law | Absent | 8,769 | 72.8 (71.9, 73.8) | 5.1 (4.6, 5.7) |  | 10.0 (9.3, 10.8) |  | 81.6 (80.6, 82.5) |  |
|  | Present | 3,047 | 27.2 (26.2, 28.1) | 4.5 (3.6, 5.4) | 0.282 | 8.8 (7.6, 9.9) | 0.086 | 85.1 (83.6, 85.5) | **<0.001** |

**Table S3: 2013-2017 TSCI estimated past-year driving within one hour of marijuana use, personal acceptance of driving after marijuana use, and support for per-se laws with unadjusted p-values.**

aThe unweighted sample size includes those with missing values or non-response to questions (1)-(3).

bBoldface denotes statistical significance at the threshold of 0.05.

| **Variable** | **Level** | **Unweighted sample size**a | **Weighted percent of total sample**  **(95% CI)** | **Marijuana users who self-reported driving within one hour of using marijuana at least once in the last year.** | | **Marijuana users who said driving within one hour of using marijuana is somewhat or completely acceptable.** | | **Marijuana users who somewhat or strongly support a per-se marijuana law.** | |
| --- | --- | --- | --- | --- | --- | --- | --- | --- | --- |
| **Weighted**  **percent**  **(95% CI)** | **Rao-Scott**  **p-value**b | **Weighted**  **percent**  **(95% CI)** | **Rao-Scott**  **p-value**b | **Weighted**  **percent**  **(95% CI)** | **Rao-Scott**  **p-value**b |
| Full Sample | NA | 1,131 | -- | 46.3 (42.5, 50.1) | -- | 39.1 (35.3, 42.8) | -- | 53.2 (49.4, 57.0) | -- |
| Marijuana Policy | RM and MM illegal | 501 | 45.0 (42.4, 47.5) | 48.9 (43.7, 54.1) |  | 43.9 (38.1, 49.7) |  | 48.0 (42.2, 53.8) |  |
| RM illegal, MM legal | 502 | 44.8 (41.9, 47.7) | 50.6 (45.5, 55.8) |  | 36.9 (31.4, 42.3) |  | 54.3 (48.6, 59.9) |  |
| RM and MM legal | 128 | 10.2 (8.5, 11.9) | 28.0 (19.0, 37.0) | **<0.001** | 29.2 (18.8, 39.2) | **0.035** | 68.9 (58.5, 79.4) | **0.004** |
| Per-se law | Absent | 851 | 73.8 (71.3, 76.3) | 48.0 (44.0, 51.9) |  | 39.8 (35.5, 44.1) |  | 51.1 (46.8, 55.5) |  |
|  | Present | 280 | 26.2 (23.7, 28.6) | 45.7 (38.9, 52.4) | 0.562 | 37.1 (29.8, 44.4) | 0.539 | 58.9 (51.5, 66.4) | 0.079 |

**Table S4: 2013-2017 TSCI estimated past-year driving within one hour of marijuana use, personal acceptance of driving after marijuana use, and support for per-se laws among respondents who self-reported using marijuana in the last year.**

aThe unweighted sample size includes those with missing values or non-response to questions (1)-(3).

bBoldface denotes statistical significance at the threshold of 0.05.
